**Beyond financial conflicts of interest:  
Institutional oversight of faculty consulting agreements  
at schools of medicine and public health**

Michelle M. Mello<sup>1\*</sup>, Lindsey Murtagh<sup>2</sup>, Steven Joffe<sup>3</sup>,  
Patrick L. Taylor<sup>4</sup>, Yelena Greenberg<sup>2</sup>, and Eric G. Campbell<sup>5</sup>

\* Corresponding author. Email: [mmello@law.stanford.edu](mailto:mmello@law.stanford.edu) (MMM)

**Version Date:** 8/10/18

**Short title:** Oversight of Faculty Consulting

---

<sup>1</sup> Stanford Law School and the Department of Health Research and Policy, Stanford University School of Medicine, Stanford, California, United States of America

<sup>2</sup> Department of Health Policy and Management, Harvard T.H. Chan School of Public Health, Boston, Massachusetts, United States of America

<sup>3</sup> Department of Medical Ethics and Health Policy, University of Pennsylvania Perelman School of Medicine, Philadelphia, Pennsylvania, United States of America

<sup>4</sup> Petrie-Flom Center for Health Law Policy, Biotechnology and Bioethics, Harvard Law School, Cambridge, Massachusetts, United States of America

<sup>5</sup> Center for Bioethics and Humanities, University of Colorado School of Medicine, Aurora, Colorado, United States of America

## Abstract

**Importance.** Approximately one-third of U.S. life sciences faculty engage in industry consulting. Despite reports that consulting contracts often impinge on faculty and university interests, institutional approaches to regulating consulting agreements are largely unknown.

**Objective.** To investigate the nature of institutional oversight of faculty consulting contracts at U.S. schools of medicine and public health.

**Design.** Structured telephone interviews with institutional administrators. Questions included the nature of oversight for faculty consulting agreements, if any, and views about consulting as a private versus institutional matter. Interviews were analyzed using a structured coding scheme.

**Setting.** All accredited schools of medicine and public health in the U.S.

**Participants.** Administrators responsible for faculty affairs were identified via internet searches and telephone and email follow-up. The 118 administrators interviewed represented 73% of U.S. schools of medicine and public health, and 75% of those invited to participate.

**Intervention.** Structured, 15-30 minute telephone interviews.

**Main outcomes and measures.** Prevalence and type of institutional oversight; responses to concerning provisions in consulting agreements; perceptions of institutional oversight.

**Results.** One third of institutions (36%) required faculty to submit at least some agreements for institutional review and 36% reviewed contracts upon request, while 35% refused to review contracts. Among institutions with review, there was wide variation the issues covered. The most common topic was intellectual property rights (64%), while only 23% looked at publication rights and 19% for inappropriately broad confidentiality provisions. Six in ten administrators reported they had no power to prevent faculty from signing consulting agreements. Although

most respondents identified institutional risks from consulting relationships, many maintained that consulting agreements are “private.”

**Conclusions and relevance.** Oversight of faculty consulting agreements at U.S. schools of medicine and public health is inconsistent across institutions and usually not robust. The interests at stake suggest the need for stronger oversight.

## 1 **Introduction**

2           Approximately one-third of life sciences faculty engage in industry consulting [1],  
3 providing paid advice or services to companies whose activities relate to their areas of  
4 expertise.[1,2,3,4] Consulting activities can be valuable in advancing science and technology in  
5 medicine and the life sciences,[5] yet they create controversy because they may influence the  
6 conduct and reporting of research and undercut openness in science.[6,7,8,9,10] To date, the  
7 public conversation and resultant policy action have focused on financial conflicts of interest  
8 (fCOI). The potential for financial incentives to influence faculty to act in ways that are  
9 inconsistent with their duties to universities and research participants and contrary to the core  
10 values of science has led to a broad net of public and private oversight.[6,11,12]

11           Financial conflicts stemming from industry relationships, however, are not the only  
12 reason for concern. Both industry-sponsored research and private consulting relationships rely  
13 upon contracts between companies and faculty or their institutions that create legally enforceable  
14 obligations and rights. As with sponsored research,[13] companies might use consulting  
15 contracts to exert inappropriate influence over academic research and investigators.[14,15,16]  
16 For example, consulting contracts may require the company's approval for the consultant to  
17 publish, even for work beyond the scope of the consultancy; restrict the consultant's ability to  
18 make public statements or engage in projects that are inimical to the company's interests; or give  
19 the company ownership of intellectual property generated during the period of the consultancy  
20 even if it arises from the consultant's academic work.[17]

21           Although medical school administrators and attorneys report that consulting agreements  
22 often contain language that restricts faculty members' academic freedom and may threaten the  
23 integrity of their research [18], institutions' approaches to addressing such problems have rarely

24 been systematically studied.[19] Available guidelines are limited and no regulatory statements  
25 address universities' roles in managing nonfinancial aspects of consulting relationships. An  
26 Institute of Medicine committee and the Institute on Medicine as a Profession support  
27 institutional review of consulting contracts, but they offer no details concerning the nature of the  
28 review.[6,20] The Association of American Medical Colleges provides a list of “topics and  
29 questions to consider” that is “neither exhaustive nor exemplary.”[21] The American Association  
30 of University Professors simply advises that faculty should not sign consulting contracts that  
31 undercut their ability to express their opinions [11]; and guidelines from the Pew Charitable  
32 Trusts merely state that consulting contracts should have “clear deliverables” and compensation  
33 set at fair market value.[22] Responsibility for executing appropriate consulting agreements is  
34 largely devolved to individual faculty or supervisors, who may be unaware of the potentially  
35 significant legal implications of what they sign. Here, we report the first empirical findings  
36 concerning the extent to which U.S. schools of medicine and public health regulate the content of  
37 faculty consulting agreements.

## 38 39 **Materials and methods**

### 40 **Sample**

41 We interviewed administrators at accredited U.S. medical schools and schools of public  
42 health. To recruit respondents, we searched schools' websites to identify individuals who, given  
43 their positions, were likely to be knowledgeable about faculty consulting. We requested an  
44 interview or referral to a more knowledgeable administrator at the same institution. Where  
45 persons initially contacted did not respond or declined participation without indicating whether

46 they were an appropriate respondent, we identified another knowledgeable person at the school  
47 using information on the school’s website. Participants received a \$20 incentive.

48 Oversight of consulting was sometimes centralized rather than managed separately within  
49 the medical and public health schools. For these “affiliated” schools, we interviewed one  
50 informant from the office conducting centralized oversight unless he/she indicated we should  
51 also speak to someone else. In calculating response rate, we counted affiliated schools as one  
52 institution, resulting in a denominator of 157 eligible persons (details in Appendix).

## 53 54 **Interviews**

55 We conducted 15- to 30-minute telephone interviews in 2011 using a computer-assisted  
56 interview guide on the REDCap Survey platform. [23] Questions were developed based on a  
57 checklist of restrictive provisions developed by a major academic center and a past survey  
58 concerning sponsored research agreements. [13] Interviewers provided a definition of  
59 “consulting relationship” and distinguished it from sponsored research.

60 Interviews were conducted by one of three investigators, following training that included  
61 listening in on several interviews to achieve consistency in style. Interviewers took detailed notes  
62 in REDCap during the interview.

## 63 64 **Analysis**

65 A detailed coding guide for free-text interview responses was created based on two  
66 investigators’ review of a sample of six schools’ interview notes and recollections of responses  
67 from other interviews. Each investigator generated a coding scheme independently and  
68 differences were discussed and resolved. The final coding guide was programmed into REDCap  
69 and each set of interview notes was coded by one of two investigators. The resulting quantitative

70 data were analyzed using Stata 10 (College Station, TX). Multivariable logistic regression was  
71 used to examine school characteristics as predictors of oversight approach, applying a  
72 significance level of 0.05 in two-tailed tests. Some free-text responses were qualitatively  
73 analyzed. The study was approved by the Harvard School of Public Health institutional review  
74 board. All participants gave written informed consent to research participation.

75

## 76 **Results**

### 77 **Sample characteristics**

78 Interviews were completed with administrators representing 127 of 173 medical schools  
79 and schools of public health in the U.S. (73%) (Table 1). Of 157 eligible administrators, 118  
80 (75%) participated. The most common job title was some variant of associate dean for research,  
81 but directors of offices of sponsored programs, research compliance and general counsel were  
82 also highly represented.

83

| <b>Table 1. Characteristics of institutions represented in key informant interview sample</b> |     |                |
|-----------------------------------------------------------------------------------------------|-----|----------------|
|                                                                                               | No. | % <sup>a</sup> |
| Institutions represented                                                                      | 127 | --             |
| Schools of medicine                                                                           | 95  | 75%            |
| Schools of public health                                                                      | 32  | 25%            |
| Number of administrators interviewed <sup>b</sup>                                             | 118 | --             |
| Mean number per institution                                                                   | 1.1 | --             |
| Schools' NIH funding rank                                                                     |     |                |
| Schools of medicine:                                                                          |     |                |
| Top 10%                                                                                       | 11  | 12%            |
| 11%-51%                                                                                       | 42  | 44%            |
| Bottom 50%                                                                                    | 40  | 42%            |
| Not available                                                                                 | 2   | 2%             |
| Schools of public health:                                                                     |     |                |

|               |    |     |
|---------------|----|-----|
| Top 10%       | 4  | 13% |
| 11%-51%       | 14 | 44% |
| Bottom 50%    | 12 | 38% |
| Not available | 2  | 6%  |

<sup>a</sup> Percentages may not sum to 100 due to rounding.

<sup>b</sup> At institutions' request, two informants were interviewed at each of 12 institutions. Fourteen administrators each had responsibility for oversight at two or more affiliated schools.

84

85           Fourteen key informants represented more than one school within their university. At 12  
86 institutions, we interviewed two informants because administrators suggested we speak with  
87 someone at both the school and the university/health campus level. Their responses were merged  
88 because institutions were the unit of analysis.

89

## 90 **Prevalence and types of oversight approaches**

91           About one third of institutions (36%) required faculty to submit consulting agreements  
92 for institutional review prior to execution; however, only about half of these (23 institutions)  
93 required review for all agreements (Table 2). The other 17 required review only if certain  
94 triggering conditions were present—for instance, the consulting activity was related to the  
95 faculty member's research, or the faculty member opted to make the institution a party to the  
96 contract. At a third of institutions (36%), administrators would review faculty members'  
97 consulting agreements upon request but did not require review. Thirty-nine institutions (35%)  
98 did not review consulting agreements even if asked. In multivariable logistic regression models  
99 controlling for NIH funding rank tercile and school type (medical versus public health), neither  
100 characteristic significantly predicted the likelihood of taking each approach to reviewing  
101 consulting agreements (mandatory, optional, or no review) (results not shown).

102

103



**Table 2. Prevalence of institutional oversight approaches for faculty consulting agreements among schools of medicine and public health <sup>a</sup>**

| Type of oversight                                                                | No.       | %          |
|----------------------------------------------------------------------------------|-----------|------------|
| <b>Mandatory review</b>                                                          | <b>40</b> | <b>36%</b> |
| All agreements reviewed                                                          | 23        | 21%        |
| Under some circumstances                                                         | 17        | 15%        |
| <b>Optional review available</b>                                                 | <b>40</b> | <b>36%</b> |
| When faculty member asks, but done purely as a favor                             | 38        | 34%        |
| Under some conditions only                                                       | 3         | 3%         |
| <b>No review available</b>                                                       | <b>39</b> | <b>35%</b> |
| <b>Other approaches</b>                                                          | <b>55</b> | <b>49%</b> |
| May be included in conflict-of-interest disclosure process                       | 22        | 20%        |
| School tries to convert project to sponsored research; only reviews if converted | 13        | 12%        |
| Addendum provisions required to be included                                      | 7         | 6%         |
| Addendum available listing recommended provisions                                | 7         | 6%         |
| Other                                                                            | 5         | 5%         |

<sup>a</sup> Denominator for proportions (112) is the number of “affiliated schools” (universities where a single administrator handled matters for 2 or more schools) plus the number of “unaffiliated” schools of medicine plus the number of “unaffiliated” schools of public health. Percentages may not sum to 100 due to rounding or because response categories were not mutually exclusive (e.g., 7 schools coupled mandatory review for some types of agreements with optional review for others).

104

105           Many institutions described oversight approaches other than reviewing consulting  
106 agreements. Twenty-two (20%) said that information about restrictive provisions might be  
107 elicited during the school’s fCOI disclosure process, but acknowledged that this typically  
108 occurred after contract execution. Thirteen (12%) attempted to persuade faculty to convert  
109 consulting contracts to sponsored research agreements, which would be reviewed by the school’s  
110 sponsored programs office. Fourteen required or recommended that faculty attach a standard  
111 addendum to their consulting contracts containing generic provisions designed to protect the  
112 university’s and/or faculty member’s interests. Twenty-six institutions (23%) reported that they

113 had no oversight mechanisms relating to restrictive provisions in consulting agreements, though  
114 they did have conflict-of-commitment policies.

115

## 116 **Qualifications of contract reviewers**

117 The 73 institutions that reviewed consulting agreements on either an optional or a  
118 mandatory basis reposed responsibility for such review in a variety of types of administrators.  
119 Most common was the office of legal counsel (51%), followed by offices of research  
120 administration or industry relations (41%) and offices of technology transfer or intellectual  
121 property (30%). Smaller proportions used department chairs (10%), representatives from offices  
122 of the dean or president (12%), research compliance officers (12%), or fCOI committee staff  
123 (14%). Half (51%) required that reviewers have legal or risk-management training.

124

## 125 **Issues covered by institutional review**

126 Among the 73 institutions that reviewed consulting agreements, the issues addressed by  
127 review varied widely (Table 3). The most common focus was protection of the university's  
128 intellectual property rights (64%), followed by fCOI (29%), conflicts of commitment (29%), and  
129 whether services were being offered for fair market value (25%). Few institutions (7%) reviewed  
130 agreements to verify that required addenda had been attached, that the consulting arrangement  
131 did not violate applicable law (16%), or that the arrangement would not adversely affect trainees  
132 (4%).

133

134

135

136

**Table 3. Issues covered in institutional review of consulting agreements (n=73)<sup>a</sup>**

| Issues included in review                                                                      | No. | %   |
|------------------------------------------------------------------------------------------------|-----|-----|
| <b>Predominantly institutional interests</b>                                                   |     |     |
| Intellectual property rights                                                                   | 47  | 64% |
| Use of institution's property                                                                  | 11  | 15% |
| Use of institution's name in consulting activity                                               | 8   | 11% |
| Institution is not a party to the agreement                                                    | 7   | 10% |
| Effect on students/teaching                                                                    | 3   | 4%  |
| Inappropriate disclosure of information owned by institution                                   | 2   | 3%  |
| <b>Conflicts between institution's and faculty member's interests</b>                          |     |     |
| Potential conflicts of interest                                                                | 21  | 29% |
| Conflicts of commitment                                                                        | 21  | 29% |
| Compliance with policies on consulting/outside activities                                      | 14  | 19% |
| Whether proposed activity impermissibly overlaps with faculty member's institutional work/role | 16  | 22% |
| Existence of statement that obligations to school take precedence over obligations to company  | 11  | 15% |
| Whether proposed activity is consistent with institution's mission                             | 2   | 3%  |
| <b>Predominantly faculty member's interests</b>                                                |     |     |
| Publication restrictions                                                                       | 17  | 23% |
| Liability issues                                                                               | 16  | 22% |
| Confidentiality of information received through the consulting work                            | 14  | 19% |
| Noncompete clauses affecting faculty member's future research activities                       | 10  | 14% |
| Choice of law / dispute resolution provisions                                                  | 5   | 7%  |
| Issues raised by faculty member as concerning                                                  | 2   | 3%  |
| <b>Other issues</b>                                                                            |     |     |
| Whether services are provided for fair market value                                            | 18  | 25% |
| Violation of state or federal laws/policies (e.g., NIH policy)                                 | 12  | 16% |
| General appropriateness of consulting arrangement                                              | 9   | 12% |
| Whether faculty member is asked to endorse a product                                           | 6   | 8%  |
| Addendum or other required provisions are included                                             | 5   | 7%  |
| Termination provisions                                                                         | 3   | 4%  |
| Unclear from interview responses                                                               | 9   | 12% |

<sup>a</sup> Denominator for proportions (73) is the number of schools that conducted some type of mandatory or voluntary review. Percentages may not sum to 100 due to rounding or because response subcategories are not mutually exclusive. Table excludes some issues mentioned by only one respondent

137

138

139

140 Review rarely included matters that predominantly affected the faculty member's  
141 interests, rather than the university's. Strikingly, less than a quarter of institutions examined  
142 consulting contracts for restrictions on publication rights. About 22% looked for provisions that  
143 could expose faculty to liability risk. Less than a fifth looked at the scope of confidentiality  
144 provisions. Only 14% looked for noncompete clauses that could affect the faculty member's  
145 future research activities. In general, the higher the administrative level at which review took  
146 place, the more inclusive was the range of issues covered by the review.

### 147 148 **Responses to problematic provisions in consulting agreements**

149 When reviewers identified a seemingly problematic provision in a consulting contract,  
150 only some took assertive action (Table 4). Twenty-two of 73 institutions (30%) told the faculty  
151 member the provision must be changed and had the faculty member negotiate with the company,  
152 and 22% were willing to negotiate directly with the company. Many others referred the matter to  
153 legal counsel or senior university administrators for follow-up. Only 38% reported having the  
154 authority to prevent the faculty member from entering into the consulting relationship if their  
155 concerns were not resolved.

**Table 4. Institutional reviewers' responses to troubling provisions in consulting agreements (n=73)<sup>a</sup>**

| Response                                                                                                                           | No. | %   |
|------------------------------------------------------------------------------------------------------------------------------------|-----|-----|
| <b>Assertive</b>                                                                                                                   |     |     |
| Can prevent faculty from entering into agreements if concerns are not resolved                                                     | 28  | 38% |
| Alert faculty member of problematic provisions, indicate that they must be changed, and have faculty member negotiate with company | 22  | 30% |
| Negotiate with company to reach agreement satisfying institutional concerns                                                        | 16  | 22% |
| Refer to / consult with institution's legal counsel                                                                                | 15  | 21% |
| Refer to / consult with more senior-level administrator                                                                            | 10  | 14% |
| Require company to agree to terms of standard addendum/provisions                                                                  | 5   | 7%  |
| Try to convert consulting relationship to a sponsored research agreement                                                           | 3   | 4%  |
| Refer to / consult institution's office of intellectual property                                                                   | 2   | 3%  |

|                                                                                                                                                                                                                                                |    |     |
|------------------------------------------------------------------------------------------------------------------------------------------------------------------------------------------------------------------------------------------------|----|-----|
| <b>More passive</b>                                                                                                                                                                                                                            |    |     |
| Alert faculty member of problematic provisions                                                                                                                                                                                                 | 26 | 36% |
| Advise faculty member to retain own legal counsel                                                                                                                                                                                              | 17 | 23% |
| Recommend (but do not require) changes regarding provisions that affect institutional interests                                                                                                                                                | 8  | 11% |
| Recommend (but do not require) changes regarding provisions that affect faculty member's own interests                                                                                                                                         | 6  | 8%  |
| Unclear from interview responses                                                                                                                                                                                                               | 15 | 21% |
| <sup>a</sup> Denominator for proportions (73) is the number of schools that conducted some type of mandatory or voluntary review. Percentages may not sum to 100 due to rounding or because response subcategories are not mutually exclusive. |    |     |

156  
157 Commonly, reviewers simply alerted faculty to problematic provisions and left the matter  
158 in the faculty member's hands (36%). Seventeen institutions (23%) advised faculty to hire an  
159 outside attorney to resolve the issue.

## 160 161 **Perceptions of the need for institutional oversight**

162 When asked to characterize how they perceived faculty consulting relationships to affect  
163 the institution's interests, administrators identified both positive and negative effects. The most  
164 frequently mentioned benefits were helping to disseminate knowledge or speed research  
165 translation (35%), building external relationships (26%), raising the profile of the institution  
166 (21%) or faculty member (15%), giving faculty real-world experience (19%), creating research,  
167 educational, and funding opportunities (18%), and allowing faculty to supplement their income,  
168 which helped with retention (10%).

169 Most respondents (84%) recognized one or more potential negative implications of  
170 consulting relationships for the institution. The most common theme was that consulting  
171 relationships could restrict academic freedom, research activities, and/or research integrity  
172 (63%). Thirty-eight percent felt consulting could influence how faculty carry out their

173 institutional roles and duties and 36% remarked that consulting activities could threaten the  
 174 integrity of the institution or trust in its teaching or research. Similarly, many mentioned that  
 175 consulting relationships could damage the institution’s reputation (30%), create conflicts of  
 176 commitment (27%), or threaten the institution’s intellectual property rights (20%).

177 Institutions that required review of consulting contracts pointed to these risks when  
 178 explaining the reasons for their approach (Table 5). Many expressed the desire to avoid legal  
 179 problems or public scandals over faculty activities, while a few pointed to the need to safeguard  
 180 the university’s intellectual property or voiced a sense that mandatory review of consulting  
 181 contracts was the responsible thing to do.

**Table 5. Institutions’ reasons for adopting particular approaches to review of consulting agreements<sup>a</sup>**

|                                                                                                                         | No. | % of subgroup |
|-------------------------------------------------------------------------------------------------------------------------|-----|---------------|
| <b>Institutions with mandatory review (n=40)</b>                                                                        |     |               |
| Ensure compliance with state and federal law/policies                                                                   | 7   | 18%           |
| Negative publicity about conflicts of interest                                                                          | 8   | 20%           |
| It’s the responsible thing to do                                                                                        | 4   | 10%           |
| Concern about loss of intellectual property rights                                                                      | 4   | 10%           |
| General concern about protecting institution’s interests                                                                | 4   | 10%           |
| Avoid conflicts of interest                                                                                             | 3   | 8%            |
| Because consulting payments go to institution                                                                           | 3   | 8%            |
| Ensure compliance with university policies                                                                              | 2   | 5%            |
| Unsure                                                                                                                  | 2   | 5%            |
| Unclear from interview responses                                                                                        | 4   | 10%           |
| Other                                                                                                                   | 12  | 30%           |
| <b>Institutions with optional review (n=40)</b>                                                                         |     |               |
| Consulting agreements are private matters, outside of faculty members’ employment obligations and institution’s purview | 5   | 13%           |
| Contract review viewed as a service offered to faculty                                                                  | 4   | 10%           |
| Mandatory review would require too many resources                                                                       | 3   | 8%            |
| Intermediate step on the road towards routine, mandatory review                                                         | 3   | 8%            |
| Best fit with institution’s culture                                                                                     | 2   | 5%            |
| Unsure                                                                                                                  | 1   | 3%            |
| Unclear from interview responses                                                                                        | 4   | 10%           |
| Other                                                                                                                   | 3   | 8%            |

| <b>Institutions with no review (n=39)</b>                                                                               |    |     |
|-------------------------------------------------------------------------------------------------------------------------|----|-----|
| Consulting agreements are private matters, outside of faculty members' employment obligations and institution's purview | 14 | 36% |
| Issue has never really been considered / not on institution's radar screen as important                                 | 14 | 36% |
| Mandatory review requires too many resources / too time-consuming                                                       | 6  | 15% |
| School's financial conflict-of-interest process adequately addresses problematic issues                                 | 4  | 10% |
| Faculty have the right to engage in consulting                                                                          | 3  | 8%  |
| Might create legal risk for institution                                                                                 | 2  | 5%  |
| Lack of legal expertise / concern about legal ethics                                                                    | 2  | 5%  |
| Resistance from within school                                                                                           | 1  | 3%  |
| Unsure                                                                                                                  | 2  | 5%  |
| Unclear from interview responses                                                                                        | 6  | 15% |
| Other                                                                                                                   | 3  | 8%  |

<sup>a</sup> Percentages may not sum to 100 due to rounding or because response subcategories are not mutually exclusive.

182  
183 A view that consulting agreements are private matters, outside of faculty members'  
184 employment obligations and the university's purview, was the primary reason that institutions  
185 made contract review optional (13%) or unavailable (36%). However, more than a third (36%) of  
186 the schools at which review was unavailable indicated that the issue of restrictive provisions in  
187 these contracts simply had not been on their radar screens. A minority of schools that did not  
188 provide review gave substantive reasons for rejecting that approach (Table 5)—for example, it  
189 would create a professional ethics problem for the university's attorney, whose client was the  
190 institution, not individual faculty.

191  
192 **Discussion**

193 Universities and the public stand to lose when contractual relationships between faculty  
194 and companies are not carefully managed. Restrictive provisions in consulting agreements may  
195 jeopardize the progress of science by shifting intellectual property rights and restricting faculty  
196 members' ability to publish scholarly work, engage in free intellectual discourse, pursue lines of

197 scientific inquiry, and meet responsibilities to trainees.[15] Because consulting contracts create  
198 legally enforceable obligations that dictate behavior, not just incentives that may influence  
199 behavior, they are potentially of even greater concern than fCOI.

200 A lawsuit involving Stanford University illuminates the stakes.[17,24] The case arose  
201 after a research fellow employed by Stanford sojourned at a biotechnology company and  
202 subsequently developed an HIV testing method that built on his work during that time. His  
203 employment contract assigned his rights in inventions to Stanford. When Stanford sued to  
204 enforce its patents on the test, the company's new owner responded that the researcher had  
205 signed a contract assigning the company his rights to inventions made during his time there.  
206 Resolving the conflicting contracts, the Supreme Court held in 2011 that the rights belonged to  
207 the company.

208 As this case demonstrates, the obligations that researchers assume in consulting  
209 agreements may cost universities dearly.[25] Moreover, the terms of consulting agreements may  
210 undercut the governance structures for collaborative research created by public and other  
211 funders, journal editors, and the law. They may, for instance, disrupt presumptions about  
212 authorship, intellectual property, and public disclosure obligations. Restrictive provisions in  
213 consulting agreements can also harm students and academic collaborators—for example, by  
214 signing away their rights in collaboratively developed inventions or imposing confidentiality  
215 obligations on them without their knowledge.

216 Previous research has explored institutional oversight of fCOI  
217 [6,22,26,27,28,29,30,31,32] and clinical trial agreements.[13,33,34,35,36] Our own work has  
218 examined normative beliefs about regulating consulting agreements among administrators at  
219 medical schools that have taken a particularly active approach.[19] The present study is the first,



220 however, to systematically examine norms and practices relating to consulting oversight across  
221 U.S. medical schools and schools of public health.

222

## 223 **Shortcomings of current oversight**

224 The important interests at stake call into question the traditional view of consulting  
225 agreements as private arrangements subject only to self-regulation by faculty and companies. In  
226 investigating whether practices among schools of medicine and public health reflect the  
227 traditional view, our study revealed several interesting findings.

228 First, there is heterogeneity in schools' approaches to regulating the terms of consulting  
229 agreements. Schools are split between requiring institutional review of agreements, offering it as  
230 an option, and declining to provide review. Higher research intensity (NIH funding rank) did not  
231 predict approach. Rather, respondents attributed decisions to whether the potential risks of  
232 faculty consulting were on the institution's "radar screen" and the extent to which institutional  
233 culture enshrined the view that consulting activities are private. In short, institutions lack a  
234 shared norm that they are justified in regulating this area at all, much less in a particular way.

235 Some institutions reported using other approaches instead of contract review, such as  
236 providing a standard addendum of provisions to be included in agreements. These mechanisms  
237 are weak compared to reviewing contracts, however. Providing an addendum does not ensure  
238 that faculty will include it, and beliefs that the fCOI disclosure process would identify restrictive  
239 contractual provisions seem misplaced in light of the rarity with which contracts are submitted.  
240 Even among schools that review contracts, there was substantial variation in what their review  
241 covered and how they responded to problematic provisions.

242 Second, contract review often focuses on protecting the institution's own interests. In  
243 contrast to the two thirds of reviewing institutions that looked for provisions relating to

244 intellectual property rights, less than a quarter looked for inappropriate restrictions on a faculty  
245 member's ability to publish, provisions placing faculty at liability risk, or inappropriately broad  
246 confidentiality provisions. Review was frequently conducted by technology transfer offices,  
247 whose remit is to protect the university's intellectual property. Such offices have little incentive  
248 to promote publication rights because publicizing inventions can undermine their patentability.

249 Third, many institutional administrators articulated conflicting views regarding whether  
250 universities should regulate this area. Many characterized consulting contracts as "private" and  
251 outside the institution's purview, yet recognized that they can implicate the university's interests  
252 in numerous, important ways. This dissonance may reflect more than reluctance to intrude into  
253 faculty members' "private time," which could affect schools' ability to attract and retain top  
254 faculty. It may also spring from worries that reviewing consulting contracts could make the  
255 university vulnerable to lawsuits relating to those agreements.

256 Our study has limitations. Despite the high response rate, nonresponse bias may have  
257 affected our results. Interviews were conducted in 2011 and institutions subsequently may have  
258 changed their approaches, although we have no reason to think many have done so. Finally,  
259 interviews were not fully transcribed and nuances of responses could have been missed in  
260 notetaking.

## 261 **Strengthening oversight**

263 Our findings suggest that oversight of faculty consulting agreements at most U.S. medical  
264 schools and schools of public health is highly variable and usually not robust. The evidence that  
265 consulting contracts often contain restrictive provisions and that such provisions can lead to  
266 harm is largely anecdotal [14,37,38], but the potential for harm and the spottiness of existing  
267 review practices raise questions about whether greater oversight should be exercised.

268 Management approaches could range from faculty training to mandatory review of  
269 consulting agreements.[19] Approaches that vest discretion in faculty to seek review may prove  
270 ineffectual because faculty may not appreciate the risks involved [16] even with educational  
271 outreach from the university, and have a countervailing financial interest in proceeding with the  
272 consulting relationship and avoiding the hassle of contract review. Faculty with the most  
273 problematic agreements may be the least willing to expose themselves to scrutiny.

274 One solution would be a “pay or play” policy in which universities would require faculty  
275 either to submit their consulting agreement for university review or attest that it was reviewed by  
276 a qualified attorney. The university could maintain a list of attorneys it has educated about its  
277 perspective on potentially problematic contractual provisions. The cost of external legal review  
278 could be built into faculty members’ consulting fees.

279 Requiring legal review of consulting contracts would likely meet with resistance from  
280 faculty, particularly if applied to consultancies with low remuneration. However, the history of  
281 fCOI regulation suggests this is no reason to abstain from oversight and that resistance would  
282 dissipate as institutions’ new role becomes culturally engrained. It also suggests that intervention  
283 from regulators and stronger guidance from professional organizations may be necessary to  
284 harmonize institutional approaches.

285 The irony of not regulating consulting contracts because they are “private” is that there is  
286 no obligation more fundamental for a tax-exempt organization than to be operated for the public  
287 benefit, and inappropriate contracts may divert institutional resources away from public  
288 purposes. Greater recognition of the ways in which faculty members’ putatively private  
289 consulting activities implicate public and institutional interests can promote the integrity of these  
290 valuable but ethically fraught relationships.

## 291 **Acknowledgments**

292           The authors gratefully acknowledge Marc Lipsitch and David Korn for helpful comments  
293 on the project's approach and findings and Aurora DeMattia for project assistance.

294

## 295 **References**

- 
1. Zinner DE, Bolcic-Jankovic D, Clarridge B, Blumenthal D, Campbell EG. Participation of academic scientists in relationships with industry. *Health Affairs*. 2009 Nov 01;28(6):1814-25.
  2. Boyd EA, Bero LA. Assessing faculty financial relationships with industry: A case study. *JAMA*. 2000 Nov 01;284(17):2209-14.
  3. Campbell EG, Weissman JS, Ehringhaus S, Rao SR, Moy B, Feibelmann S, et al. Institutional academic-industry relationships. *JAMA*. 2007 Oct 17;298(15):1779-86.
  4. Blumenthal D, Campbell EG, Causino N, Louis KS. Participation of life-science faculty in research relationships with industry. *N Engl J Med*. 1996 Dec 05;335(23):1734-9.
  5. Brennan TA, Rothman DJ, Blank L, Blumenthal D, Chimonas SC, Cohen JJ, et al. Health industry practices that create conflicts of interest: a policy proposal for academic medical centers. *JAMA* 2006 Jan 25;295(4):429-33.
  6. Institute of Medicine, Committee on Conflict of Interest in Medical Research, Education, and Practice. *Conflict of interest in medical research, education, and practice*. Washington, DC: National Academies Press; 2009.

- 
7. Blumenthal D, Campbell EG, Anderson MS, Causino N, Louis KS. Withholding research results in academic life science: evidence from a national survey of faculty. *JAMA*. 1997 Apr 16;277(15):1224-8.
  8. Blumenthal D, Campbell EG, Gokhale M, Yucel R, Clarridge B, Hilgartner S, et al. Data withholding in genetics and the other life sciences: prevalences and predictors. *Acad Med*. 2006 Feb 01;81(2):137-45.
  9. Bekelman JE, Li Y, Gross CP. Scope and impact of financial conflicts of interest in biomedical research: a systematic review. *JAMA*. 2003 Jan 22;289(4):454-65.
  10. Bero L. Industry sponsorship and research outcome: a Cochrane review. *JAMA Intern Med*. 2013 Apr 08;173(7):580-1.
  11. American Association of University Professors. Recommended principles to guide academic-industry relationships. Urbana, IL: University of Illinois Press; 2014.
  12. Responsibility of applicants for promoting objectivity in research for which PHS funding is sought. 42 C.F.R. Sect. 50, Subpart F [2011].
  13. Mello MM, Clarridge BR, Studdert DM. Academic medical centers' standards for clinical-trial agreements with industry. *N Engl J Med*. 2005 May 26;352(21):2202-10.
  14. Lipsitch M. The risk to academic freedom that lurks in corporate consulting contracts. *Chron High Educ*. [Internet]. 2010 Jun 27. [cited 2018 Aug 10]. Available from: <http://chronicle.com/article/The-Hidden-Risk-to-Academic/66050/>
  15. Taylor PL. Innovation incentives or corrupt conflicts of interest? Moving beyond Jekyll and Hyde in regulating biomedical academic-industry relationships. *Yale J Health Pol'y Law & Ethics*. 2013;13(1):135-97.

- 
16. Klees H, Horvitz HR. Biomedical consulting agreements: a guide for academics. Cambridge, MA: MIT Press; 2012.
  17. *Board of Trustees of the Leland Stanford Jr. Univ. v. Roche Molecular Sys., Inc.* [2011], 131 S.Ct. 2188.
  18. Klees H, Horvitz HR. Consulting agreements: the good, the bad, and the ugly. *Science Careers*. [Internet]. 2012 Oct 12 [cited 2018 Aug 10]. Available from: <http://www.sciencemag.org/careers/2012/10/consulting-agreements-good-bad-and-ugly>
  19. Morain SR, Joffe S, Campbell EG, Mello MM. Institutional oversight of faculty-industry consulting relationships in U.S. medical schools: a Delphi study. *J Law Med Ethics*. 2015 Aug 01;43(2):383-96.
  20. Institute on Medicine as a Profession [Internet]. Institute on Medicine as a Profession; c2013-2017. Consulting and honoraria: best practices for academic medical centers; 2013 Oct 10 [cited 2018 Aug 10]. Available from: [imapny.org/wp-content/themes/imapny/File%20Library/Best%20Practice%20toolkits/Best-Practices\\_Consulting-and-Honoraria.pdf](http://imapny.org/wp-content/themes/imapny/File%20Library/Best%20Practice%20toolkits/Best-Practices_Consulting-and-Honoraria.pdf).
  21. Committee on Financial Conflicts of Interest in Human Subjects Research. Protecting patients, preserving integrity, advancing health: accelerating the implementation of COI policies in human subjects research [Internet]. Washington, D.C.: Association of American Medical Colleges; 2008 Feb [cited 2018 Aug 10]. 87p. Available from: <https://members.aamc.org/eweb/upload/Protecting%20Patients,%20Preserving%20Integrity.pdf>
  22. Pew Expert Task Force on Conflicts of Interest in Medicine. Conflicts-of-interest policies for academic medical centers: recommendations for best practices [Internet]. Philadelphia,

- 
- PA: Pew Charitable Trusts; 2013 Dec 18 [cited 2018 Aug 10]. 30p. Available from <http://www.pewtrusts.org/en/research-and-analysis/reports/0001/01/01/conflictsofinterest-policies-for-academic-medical-centers>
23. Harris PA, Taylor R, Thielke R, Payne J, Gonzalez N, Conde JG. Research electronic data capture (REDCap)—a metadata-driven methodology and workflow process for providing translational research informatics support. *J Biomed Inform.* 2009 Apr 30;42(2):377-81.
  24. Kesselheim AS, Rajkumar R. Who owns federally funded research? The Supreme Court and the Bayh-Dole Act. *N Engl J Med.* 2011 Sep 29;365(13):1167-9.
  25. Feldman MP, Feller I, Bercovitz JEL, Burton RM. University technology transfer and the system of innovation. In: Feldman MP, Massard N, editors. *Institutions and systems in the geography of innovation.* New York: Springer Science+Business Media; 2002. p. 55-77.
  26. Shnier A, Lexchin J, Mintzes B, Jutel A, Holloway K. Too few, too weak: conflict of interest policies at Canadian medical schools. *PLoS One.* 2013 Jul 04;8(7):e68633.
  27. Cho MK, Shohara R, Schissel A, Rennie D. Policies on faculty conflicts of interest at US universities. *JAMA.* 2000 Nov 01;284(17):2203-8.
  28. Rothman DJ, Chimonas S. Academic medical centers' conflict of interest policies. *JAMA.* 2010 Nov 24;304(20):2294-5.
  29. Association of American Medical Colleges. Implementing the final rule on financial conflicts of interest in Public Health Service funded research: preliminary institutional considerations and approaches to selected provisions [Internet]. Washington, D.C.: AAMC; 2012 Mar [cited 2018 Aug 10]. 38p. Available from: <https://www.aamc.org/download/277644/data/coi-rule.pdf>

- 
30. Association of American Medical Colleges. AAMC COI metrics project: measuring the cost and outcomes of the NIH rule on financial conflicts of interest in PHS-funded research [Internet]. Washington, D.C.: AAMC; 2012 Apr [cited 2018 Aug 10]. Available from: <https://www.aamc.org/initiatives/research/coi/metricsproject/301010/hometsr.html>
  31. Hams M, Wilkinson WG, Zentner L, Schmidt C, Dweik RA, Karafa M, et al. A new survey to evaluate conflict of interest policies at academic medical centers. *PLoS One*. 2017 Mar 15;12(3): e0172472.
  32. Carlat DJ, Fagrelus T, Ramachandran R, Ross JS, Bergh S. The updated AMSA scorecard of conflict-of-interest policies: a survey of U.S. medical schools. *BMC Med Educ*. 2016 Aug 12;16(1):202.
  33. Schulman KA, Seils DM, Timbie JW, Sugarman J, Dame LA, Weinfurt KP, et al. A national survey of provisions in clinical-trial agreements between medical schools and industry sponsors. *N Engl J Med*. 2002 Oct 24;347(17):1335-41.
  34. Mello MM, Clarridge BR, Studdert DM. Researchers' views of the acceptability of restrictive provisions in clinical trial agreements with industry sponsors. *Account Res*. 2005 Jul 01;12(3):163-91.
  35. Kasenda B, von Elm E, You JJ, Blümle A, Tomonaga Y, Saccilotto R, et al. Agreements between industry and academia on publication rights: a retrospective study of protocols and publications of randomized clinical trials. *PLoS Med*. 2016 Jun 28;13(6):e1002046.
  36. Nathan DG, Weatherall DJ. Academic freedom in clinical research. *N Engl J Med*. 2002 Oct 24;347(17):1368-71.



- 
37. Raines B. BP buys up Gulf scientists for legal defense, roiling academic community. Alabama Media Group. Alabama. [Internet]. 2010 Jul 16 [Cited 2018 Aug 10]. Available from: [http://blog.al.com/live/2010/07/bp\\_buys\\_up\\_gulf\\_scientists\\_for.html](http://blog.al.com/live/2010/07/bp_buys_up_gulf_scientists_for.html)
38. Petersen M. As beef cattle become behemoths, who are animal scientists serving? Chron High Educ. Washington, D.C. [Internet]. 2012 Apr 15 [cited 2018 Aug 10]. Available from: <http://chronicle.com/article/As-Beef-Cattle-Become/131480>
